# Supplementary material for: Ambient mass spectrometry and near-infrared spectroscopy – a direct comparison of methods for the quantification of sucralose in e-liquids
Source: Royal Society of Chemistry journal article supplement (doi:10.1039/d3ay00380a), 2023-01-01
Supplement: d3ay00380a1.pdf [file d3ay00380a1.pdf]

## Supplementary information

Table A. 1: Ion source parameters of the developed ambient MS method

| Parameter                  | Value |
|----------------------------|-------|
| Capillary temperature /°C  | 250   |
| Capillary voltage /V       | 180   |
| Source voltage offset /V   | 35    |
| Source voltage span /V     | 0.0   |
| Source gas temperature /°C | 250   |
| ESI voltage /V             | 2500  |

Table A. 2: Tune parameter voltages of the developed ambient MS method

| Parameter            | Offset /V | Span /V |
|----------------------|-----------|---------|
| Extraction electrode | 9         | -       |
| Hexapole bias        | 8         | -       |
| Hexapole RF          | 5         | 150     |
| Ion energy           | -1.2      | -0.4    |
| Resolution           | 0.05      | -0.5    |
| Detector gain        | 1100      | -       |
